# Supplementary material
Source: MDPI journal article supplement (https://www.mdpi.com/2225-1154/8/12/138)
Supplement: s1 [file s1]

**Table S1.** Global Climate Models used to create both the CMIP5 and LOCA ensembles.

| <b>Modeling Center or Group</b>                                                                                                                                           | <b>Institute ID</b> | <b>Model Name</b>                    |
|---------------------------------------------------------------------------------------------------------------------------------------------------------------------------|---------------------|--------------------------------------|
| Commonwealth Scientific and Industrial Research Organization (CSIRO) and Bureau of Meteorology (BOM), Australia                                                           | CSIRO-BOM           | ACCESS1-0<br>ACCESS1-3               |
| Beijing Climate Center, China Meteorological Administration                                                                                                               | BCC                 | bcc-csm1-1-m                         |
| Canadian Centre for Climate Modelling and Analysis                                                                                                                        | CCCMA               | CanESM2                              |
| National Center for Atmospheric Research                                                                                                                                  | NCAR                | CCSM4                                |
| Community Earth System Model Contributors                                                                                                                                 | NSF-DOE-NCAR        | CESM1-BGC<br>CESM1-CAM5              |
| Centro Euro-Mediterraneo per I Cambiamenti Climatici                                                                                                                      | CMCC                | CMCC-CM<br>CMCC-CMS                  |
| Commonwealth Scientific and Industrial Research Organization in collaboration with Queensland Climate Change Centre of Excellence                                         | CSIRO-QCCCE         | CSIRO-Mk3-6-0                        |
| EC-EARTH consortium                                                                                                                                                       | EC-EARTH            | EC-EARTH                             |
| LASG, Institute of Atmospheric Physics, Chinese Academy of Sciences and CESS, Tsinghua University                                                                         | LASG-CESS           | FGOALS-g2                            |
| NOAA Geophysical Fluid Dynamics Laboratory                                                                                                                                | NOAA GFDL           | GFDL-CM3<br>GFDL-ESM2G<br>GFDL-ESM2M |
| NASA Goddard Institute for Space Studies                                                                                                                                  | NASS GISS           | GISS-E2-H<br>GISS-E2-R               |
| Institut Pierre-Simon Laplace                                                                                                                                             | IPSL                | IPSL-CM5A-LR<br>IPSL-CM5A-MR         |
| Atmosphere and Ocean Research Institute (The University of Tokyo), National Institute for Environmental Studies, and Japan Agency for Marine-Earth Science and Technology | MIROC               | MIROC5                               |
| Japan Agency for Marine-Earth Science and Technology, Atmosphere and Ocean Institute                                                                                      | MIROC               | MIROC-ESM-CHEM                       |

|                                                                                |       |                          |
|--------------------------------------------------------------------------------|-------|--------------------------|
| (The University of Tokyo), and National<br>Institute for Environmental Studies |       | MIROC-ESM                |
| Max Planck Institute for Meteorology                                           | MPI-M | MPI-ESM-LR<br>MPI-ESM-MR |
| Meteorological Research Institute                                              | MRI   | MRI-CGCM3                |
| Norwegian Climate Centre                                                       | NCC   | NorESM1-M                |

---
